# Supplementary material for: Rapid evolution and host immunity drive the rise and fall of carbapenem resistance during an acute Pseudomonas aeruginosa infection
Source: PubMed Central journal article supplement (PMC8080559; doi:10.1038/s41467-021-22814-9), 2021-04-28
Supplement: 41467_2021_22814_MOESM1_ESM.pdf [file 41467_2021_22814_MOESM1_ESM.pdf]

## Supplementary Information

| Primer name | Sequence 5'→3'           | Use                                    | Reference                          |
|-------------|--------------------------|----------------------------------------|------------------------------------|
| rpsl-1      | GCTGCAAAACTGCCCCGCAACG   | mRNA <i>rpsL</i><br>qRT-PCR            | Oh H <i>et al.</i> ,<br>2003 (1)   |
| rpsl-2      | ACCCGAGGTGTCCAGCGAACC    |                                        |                                    |
| mexB-U      | CAAGGGCGTCGGTGACTIONCCAG | mRNA<br><i>ampC</i> qRT-PCR            | Juan C <i>et al.</i> ,<br>2006 (2) |
| mexB-L      | ACCTGGGAACCGTCGGGATTGA   |                                        |                                    |
| acna-F      | GGGCTGGCCTCGAAAGAGGAC    | mRNA <i>mexB</i><br>qRT-PCR            | Oh H <i>et al.</i> ,<br>2003 (1)   |
| acna-R      | GCACCGAGTCGGGGAACTGCA    |                                        |                                    |
| plas-1-F    | GTATTTCTGCGCGACGTTCC     | p110820<br>transformation<br>screening | This study                         |
| plas-1-R    | CTTCGATGAGTACCGGGTCCG    |                                        |                                    |
| plas-2-F    | CTCGGTCATGCTACGGAGAC     |                                        |                                    |
| plas-2-R    | GAGTATGCGACCGATGAGCA     |                                        |                                    |
| plas-3-F    | GTGCGATGGTTGATCGCTTC     |                                        |                                    |
| plas-3-R    | GCCGTGGACGAATATCCCAT     |                                        |                                    |

**Supplementary Table 1. Primers used in study.** Refere

nces for Supplementary Information

1. Oh, H., S. Stenhoff, S. Jalal, and B. Wretlind. Role of efflux pumps and mutations in genes for topoisomerases II and IV in fluoroquinolone-resistant *Pseudomonas aeruginosa* strains. *Microb. Drug Resist.* 8:323–328 (2003).
2. Juan, C., B. Moyà, J. L. Pérez, and A. Oliver. Stepwise upregulation of the *Pseudomonas aeruginosa* chromosomal cephalosporinase conferring high-level beta-lactam resistance involves three AmpD homologues. *Antimicrob. Agents Chemother.* 50:1780–1787 (2006).
